# Supplementary material for: Structure and Validity of Questionnaire for Oral Frail Screening
Source: PubMed Central journal article supplement (PMC7824860; doi:10.3390/healthcare9010045), 2021-01-05
Supplement: healthcare-09-00045-s001.pdf [file healthcare-09-00045-s001.pdf]

### Supplemental materials

**Table 1.** Descriptive statistics of the data analyzed in this study.

|                                     | Sex |       |       | P-value* | Mean   | Age                                          |              | P-value** |
|-------------------------------------|-----|-------|-------|----------|--------|----------------------------------------------|--------------|-----------|
|                                     | Men | Women | Total |          |        | Median (25 <sup>th</sup> -75 <sup>th</sup> ) |              |           |
| Difficult to eat hard food          | No  | 285   | 296   | 585      | 0.201  | 70.9 +/- 9.0                                 | 71 (64 - 78) | 0.045     |
|                                     | Yes | 75    | 61    | 138      |        | 73.0 +/- 9.3                                 | 73 (68 - 78) |           |
| Choking                             | No  | 300   | 311   | 616      | 0.209  | 71.0 +/- 9.1                                 | 71 (64 - 78) | 0.040     |
|                                     | Yes | 58    | 46    | 105      |        | 73.3 +/- 8.8                                 | 74 (67 - 78) |           |
| Using denture                       | No  | 175   | 203   | 382      | 0.035  | 70.0 +/- 9.1                                 | 70 (63 - 77) | <0.001    |
|                                     | Yes | 181   | 153   | 336      |        | 72.9 +/- 8.8                                 | 74 (68 - 79) |           |
| Xerostomia                          | No  | 279   | 262   | 546      | 0.123  | 71.1 +/- 8.9                                 | 71 (64 - 78) | 0.265     |
|                                     | Yes | 79    | 97    | 177      |        | 72.0 +/- 9.6                                 | 73 (66 - 78) |           |
| Less frequently going out           | No  | 288   | 294   | 586      | 0.565  | 70.3 +/- 8.7                                 | 70 (64 - 77) | <0.001    |
|                                     | Yes | 70    | 64    | 136      |        | 75.6 +/- 9.5                                 | 76 (70 - 82) |           |
| Feasible to chew hard food          | Yes | 310   | 306   | 621      | 0.879  | 70.8 +/- 9.1                                 | 71 (64 - 78) | <0.001    |
|                                     | No  | 50    | 51    | 102      |        | 74.8 +/- 8.3                                 | 76 (69 - 81) |           |
| Brushing teeth at least twice a day | Yes | 251   | 304   | 560      | <0.001 | 71.1 +/- 8.9                                 | 71 (65 - 78) | 0.119     |
|                                     | No  | 108   | 54    | 163      |        | 72.2 +/- 9.5                                 | 73 (66 - 79) |           |
| Regular attendance of dental clinic | No  | 252   | 275   | 531      | 0.037  | 71.5 +/- 8.6                                 | 72 (66 - 78) | 0.419     |
|                                     | Yes | 106   | 81    | 189      |        | 70.7 +/- 10.1                                | 70 (63 - 78) |           |

\*: P-values were calculated by chi-square tests. \*\*: Age was not normally distributed by Kolmogorov Simonov tests (P<0.001), P-values were calculated by Mann-Whitney's U test.

**Table 2.** Results of factor analysis of the oral frailty check list.

|                                     | Factors |       |       |
|-------------------------------------|---------|-------|-------|
|                                     | 1       | 2     | 3     |
| Difficult to eat hard food          | 0.54    | 0.19  | 0.17  |
| Choking                             | 0.51    | 0.12  | 0.27  |
| Using denture                       | 0.43    | 0.01  | -0.07 |
| Xerostomia                          | -0.09   | 0.74  | 0.01  |
| Less frequently going out           | 0.10    | 0.34  | 0.11  |
| Feasible to chew hard food          | 0.14    | 0.28  | -0.03 |
| Brushing teeth at least twice a day | -0.07   | 0.09  | 0.76  |
| Regular attendance of dental clinic | 0.14    | <0.01 | 0.27  |
| Total                               | 0.80    | 0.79  | 0.78  |
| % of variance                       | 9.97    | 9.87  | 9.69  |
| Cumulative %                        | 9.97    | 19.84 | 29.52 |

Factor analysis was carried out by most likelihood method with varimax rotation.

**Table 3.** Three parameter logistic model under item response theory approach for the oral frailty check list.

| Factor | Item                                | Discrimination | Difficulty | Guessing |
|--------|-------------------------------------|----------------|------------|----------|
| 1      | Difficult to eat hard food          | 2.31           | 1.10       | <0.01    |
|        | Choking                             | 2.91           | 2.08       | 0.11     |
|        | Using denture                       | 1.25           | 1.04       | 0.27     |
| 2      | Xerostomia                          | 2.85           | 2.05       | 0.21     |
|        | Less frequently going out           | 1.92           | 1.94       | 0.12     |
|        | Feasible to chew hard food          | 2.04           | 1.41       | <0.01    |
| 3      | Brushing teeth at least twice a day | 0.62           | 2.14       | <0.01    |
|        | Regular attendance of dental clinic | 0.66           | 1.71       | <0.01    |

**Table 4.** Number of remaining teeth against the response for the items in oral frailty check list.

| Item                                | Score | n   | Number of remaining teeth |                                             | P-value |
|-------------------------------------|-------|-----|---------------------------|---------------------------------------------|---------|
|                                     |       |     | Mean +/- SD               | Median(25 <sup>th</sup> -75 <sup>th</sup> ) |         |
| Difficult to eat hard food          | 0     | 585 | 22.45+/-0.3               | 25(21-28)                                   | <0.001  |
|                                     | 2     | 138 | 15.07+/-0.79              | 16(7-23)                                    |         |
| Choking                             | 0     | 616 | 21.36+/-0.32              | 25(18-27)                                   | 0.023   |
|                                     | 2     | 105 | 19.17+/-0.89              | 22(13-26)                                   |         |
| Using denture                       | 0     | 382 | 25.28+/-0.25              | 27(24-28)                                   | <0.001  |
|                                     | 2     | 336 | 16.29+/-0.47              | 18(10-24)                                   |         |
| Xerostomia                          | 0     | 546 | 21.29+/-0.34              | 25(18-27)                                   | 0.236   |
|                                     | 1     | 177 | 20.41+/-0.66              | 24(16-27)                                   |         |
| Less frequently going out           | 0     | 586 | 21.39+/-0.32              | 24(18-27)                                   | 0.351   |
|                                     | 1     | 138 | 19.74+/-0.83              | 24(14-27)                                   |         |
| Feasible to chew hard food          | 1     | 621 | 13.95+/-0.92              | 14(6-22)                                    | <0.001  |
|                                     | 0     | 102 | 22.25+/-0.3               | 25(20-27)                                   |         |
| Brushing teeth at least twice a day | 1     | 560 | 18.44+/-0.78              | 23(11-27)                                   | 0.001   |
|                                     | 0     | 163 | 21.81+/-0.32              | 25(19-27)                                   |         |
| Regular attendance of dental clinic | 1     | 531 | 20.23+/-0.66              | 25(17-27)                                   | 0.270   |
|                                     | 0     | 189 | 21.39+/-0.34              | 24(18-27)                                   |         |

P-values were calculated by Mann Whitney's U tests. There existed several missing values for the item response.
